# Supplementary material for: Inter-observer agreement improves with PERCIST 1.0 as opposed to qualitative evaluation in non-small cell lung cancer patients evaluated with F-18-FDG PET/CT early in the course of chemo-radiotherapy
Source: EJNMMI Res. 2016 Sep 22;6:71. doi: 10.1186/s13550-016-0223-6 (PMC5031580; doi:10.1186/s13550-016-0223-6)
Supplement: Additional file 2: — All observers reported data. (XLSX 43 kb) [file 13550_2016_223_MOESM2_ESM.xlsx]

## Sheet: Response catagories
	Visual evaluation									PERCIST 1.0
Patient	Observer A	Observer B	Observer C	Observer D	Observer E	Observer F	Observer G	Observer H		Observer A	Observer B	Observer C	Observer D	Observer E	Observer F	Observer G	Observer H
1	1	2	2	2	2	2	2	1		1	2	2	2	2	2	2	1
2	3	3	3	3	3	3	3	3		3	3	3	3	3	3	3	3
3	1	2	2	2	2	2	2	2		1	2	2	2	2	2	2	2
4	2	2	2	2	2	2	2	2		2	2	2	2	2	2	2	2
5	3	3	3	4	3	2	3	3		3	3	3	3	3	3	3	3
6	3	3	3	4	3	3	3	3		3	3	3	3	3	3	3	3
7	3	3	3	3	3	4	3	3		3	3	3	3	3	3	3	3
8	2	2	2	4	2	2	4	2		2	2	2	4	2	2	4	3
9	2	3	2	3	2	2	3	2		2	2	2	2	2	2	2	2
10	3	2	2	2	2	2	2	2		2	2	2	2	2	2	2	2
11	3	2	2	2	2	2	2	3		2	2	2	2	3	2	2	2
12	3	3	2	3	3	3	3	3		3	3	3	3	3	3	3	3
13	2	2	2	2	2	2	2	2		2	2	2	2	2	2	2	2
14	4	4	4	2	2	3	2	3		4	4	4	2	2	2	2	2
15	3	3	3	3	3	3	3	3		3	3	3	3	3	3	3	3
16	4	3	4	4	4	4	3	4		3	3	3	3	3	3	4	3
17	3	2	2	2	3	3	3	2		3	3	3	3	3	3	3	3
18	2	2	2	2	2	2	2	2		2	2	2	2	2	2	2	2
19	3	3	2	3	3	3	3	3		3	3	3	3	3	3	3	3
20	4	4	4	4	4	4	4	3		4	4	4	4	3	4	3	3
21	3	3	3	3	3	3	3	4		3	3	3	3	3	3	3	4
22	1	1	1	1	1	1	1	1		1	1	1	1	1	1	1	1
23	2	3	2	2	2	2	2	2		2	2	2	2	2	2	2	2
24	2	2	2	2	2	2	2	2		2	2	2	2	2	2	2	2
25	3	2	2	2	2	3	3	2		3	2	3	3	3	3	3	3
26	3	3	3	3	3	3	3	3		3	3	3	3	3	3	3	3
27	2	2	2	2	2	2	2	2		2	2	2	2	2	2	2	2
28	4	4	4	4	4	3	4	4		3	3	3	3	3	3	3	4
29	3	3	3	3	3	3	3	3		3	3	3	3	3	3	3	3
30	2	4	2	2	2	2	4	4		2	4	2	2	2	2	4	4
31	3	3	3	4	3	3	3	3		3	3	3	3	3	3	3	3
32	2	2	2	2	4	2	2	2		3	3	3	3	3	3	3	3
33	3	4	3	4	3	3	4	4		3	3	3	3	3	3	3	3
34	4	4	4	4	4	3	4	4		3	4	3	3	3	3	3	3
35	3	4	4	4	4	3	4	4		3	4	4	4	4	3	3	4
1	CMR	Complete metabolic response
2	PMR	Partial metabolic response
3	SMD	Stable metabolic disease
4	PMD	Progressive metabolic disease

## Sheet: SUL peak values
Baseline SUL peak values
	Observer A	Observer B	Observer C	Observer D	Observer E	Observer F	Observer G	Observer H
1	6.44	6.44	6.44	7.97	6.44	6.44	6.44	6.44
2	5.65	5.65	5.65	5.65	5.65	5.65	5.65	5.65
3	10.21	14.73	10.21	10.21	10.21	10.21	10.21	10.21
4	7.97	13.82	7.97	7.97	7.97	7.97	7.97	7.97
5	6.15	6.15	6.15	6.15	6.15	6.15	6.15	6.15
6	11.47	11.47	11.47	7.1	11.47	11.47	14.82	11.47
7	17.88	17.88	17.88	17.88	17.88	17.88	17.88	17.88
8	11.77	11.77	11.77	11.77	11.77	11.77	11.7	16.49
9	5.19	5.09	5.09	5.09	5.09	5.09	5.09	5.09
10	16.57	16.57	16.6	16.57	16.57	16.57	16.57	16.57
11	27.88	27.88	27.88	27.88	18.13	27.88	27.88	28.02
12	8.91	8.91	8.91	8.61	8.91	8.9	8.91	8.91
13	9.6	9.6	9.6	9.6	9.6	9.6	9.6	9.6
14	19.18	19.18	19.18	26.13	19.18	19.18	19.18	19.18
15	8.82	8.82	8.82	8.82	8.82	8.82	8.82	8.82
16	5.2	7.3	5.2	5.2	5.2	5.2	5.2	5.2
17	7.95	7.95	7.95	7.95	7.95	7.95	7.95	7.95
18	12.31	12.31	12.31	12.31	12.31	12.31	12.31	12.31
19	10.57	10.57	10.57	10.57	10.57	10.57	10.57	10.57
20	13.04	13.04	13.04	13.04	13.04	13.04	13.04	13.04
21	10.18	10.81	10.18	10.18	10.64	10.18	10.18	10.18
22	9.61	9.61	9.61	9.49	9.61	9.61	9.61	9.61
23	6.52	6.52	6.52	6.52	6.52	6.52	6.52	6.52
24	16.65	16.65	16.65	16.85	16.65	16.65	16.65	16.65
25	6.98	6.98	6.98	6.98	6.98	6.98	6.98	6.98
26	9.06	9.06	9.06	9.06	9.06	9.06	9.06	9.06
27	23.85	23.85	23.85	23.85	23.85	23.85	23.85	23.85
28	14.84	14.84	14.84	14.84	14.84	14.84	14.84	14.84
29	10.35	10.35	10.35	10.35	10.35	10.35	10.35	10.35
30	8.72	8.72	8.72	8.72	8.72	8.72	8.72	8.72
31	12.34	12.34	12.34	12.34	12.34	12.34	12.34	12.34
32	10.2	10.2	10.2	10.2	10.2	10.2	8.79	8.13
33	7.1	7.1	7.1	7.1	7.1	7.1	7.1	7.1
34	10.88	10.88	10.88	10.88	10.88	10.88	10.88	10.88
35	13.89	13.89	13.89	13.89	13.89	13.89	13.89	13.89
Follow up SUL peak Values
	Observer A	Observer B	Observer C	Observer D	Observer E	Observer F	Observer G	Observer H
1	1.49	1.49	1.49	1.83	1.49	1.49	1.21	0
2	5.38	5.38	5.38	5.38	5.38	5.38	5.38	5.38
3	0	3.43	2.33	3.43	2.33	1.29	2.33	2.31
4	3.17	5.77	3.17	3.17	3.17	3.17	3.17	3.17
5	6.61	6.61	6.61	6.61	6.61	6.61	6.61	6.61
6	12.16	12.16	12.16	7.71	12.16	12.16	15.51	12.16
7	16.77	16.77	16.77	16.77	16.77	16.77	16.77	16.77
8	3.56	3.56	3.56	2.85	3.56	3.56	3.56	14.12
9	0	3.49	3.42	2.65	3.49	3.49	3.28	2.96
10	9.01	9.01	9.01	9.01	9.01	9.01	9.01	9.01
11	15.67	15.67	15.67	15.67	15.67	15.67	15.67	15.67
12	7.59	7.59	7.59	7.59	7.59	7.59	7.59	7.55
13	5.6	5.6	5.6	5.6	5.6	5.6	5.6	5.6
14	9.38	9.38	9.38	12.32	9.38	9.38	9.38	9.43
15	7.52	7.52	7.52	7.52	7.52	7.52	7.52	7.52
16	6.68	9.37	6.68	6.68	6.68	6.7	6.8	6.68
17	5.93	5.93	5.93	5.93	5.93	5.93	5.93	5.93
18	6.64	6.64	6.64	6.64	6.44	6.64	6.64	6.64
19	10.15	10.15	10.15	10.15	10.15	10.15	10.15	10.15
20	11.54	11.54	11.54	11.54	11.54	11.54	11.54	11.54
21	10.64	10.64	10.64	10.64	10.18	10.6	10.64	10.64
22	0	0	1.77	0	1.57	0	0	0
23	4.27	4.27	4.27	4.27	4.27	4.27	4.27	4.27
24	8.92	8.92	8.92	8.92	8.92	8.92	8.92	8.92
25	4.91	4.91	4.91	4.91	4.91	4.99	4.91	4.91
26	8.23	8.23	8.23	6.49	8.23	8.23	8.23	8.23
27	13.62	13.62	13.62	13.62	13.62	7.82	13.62	13.62
28	18.2	18.2	18.2	18.2	18.2	18.2	18.2	18.2
29	9.62	9.62	9.62	9.62	9.62	9.62	9.62	9.62
30	5.19	5.19	5.19	5.65	5.65	5.2	5.19	5.65
31	13.67	13.67	13.67	13.67	13.67	13.67	13.67	13.67
32	9.59	9.59	9.59	9.59	9.59	9.59	9.59	9.59
33	7.71	7.71	7.71	7.71	7.71	7.7	7.71	7.77
34	12.75	12.75	12.82	12.75	12.75	12.75	9.62	12.75
35	11.9	11.9	11.9	11.9	11.9	11.9	11.9	11.9
